# Supplementary material for: Perspective of Use of Pd/rGO in a Direct Urea Microfluidic Fuel Cell
Source: MDPI journal article supplement (doi:10.3390/catal13050788), 2023-04-22
Supplement: s1 [file s1]

April 6, 2023

## Supplementary information

### 1. Rietveld refinement of XRD diffraction

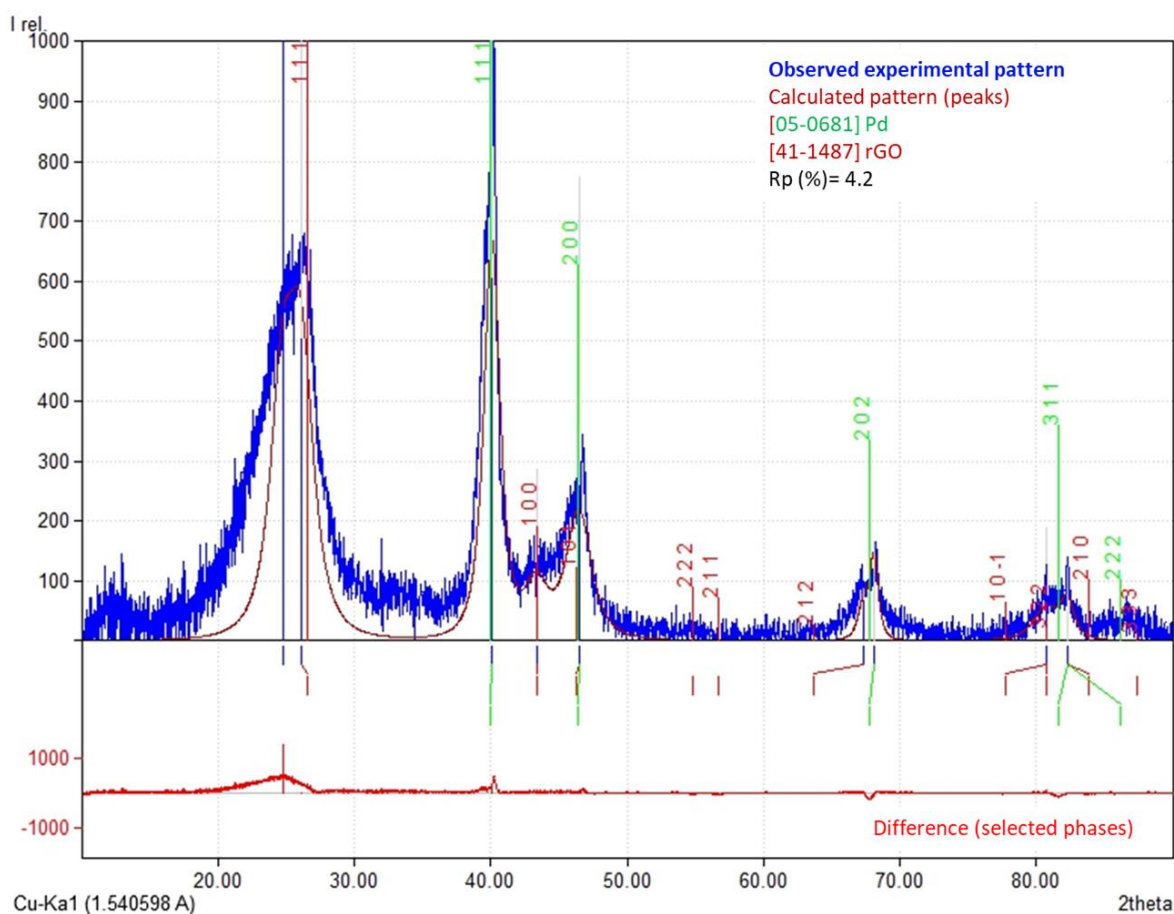

| Entry   | Formula sum | Name      | Quant.(%) |
|---------|-------------|-----------|-----------|
| 41-1487 | C           | rGO       | 88.9      |
| 05-0681 | Pd          | Palladium | 11.1      |

**Fig. S1** Rietveld refinement Pd/rGO.

**Table S1.** Calculate the crystallite size from XRD data using ritveald refinement

| K               | $\lambda$ (Å) | peak | 2 $\theta$ (°) | FWHM B(°) | FWHM error rate | FWHM B(°) | $\theta$ (rad) | L (nm) |
|-----------------|---------------|------|----------------|-----------|-----------------|-----------|----------------|--------|
| 0.9             | 1.5406        | 1    | 24.740000      | 2.1237    | 0.09791         | 2.02579   | 0.215897228    | 4.01   |
|                 |               | 2    | 26.120000      | 2.1237    | 0.09791         | 2.02579   | 0.22794        | 4.03   |
|                 |               | 3    | 40.090000      | 1.3983    | 0.09791         | 1.30039   | 0.349851249    | 6.50   |
|                 |               | 4    | 46.46          | 2.1878    | 0.09791         | 2.08989   | 0.405439985    | 4.14   |
|                 |               | 5    | 67.31          | 0.9076    | 0.09791         | 0.80969   | 0.58739056     | 11.79  |
|                 |               | 6    | 80.69          | 2.1711    | 0.09791         | 2.07319   | 0.704153087    | 5.03   |
|                 |               | 7    | 82.25          | 1.2293    | 0.09791         | 1.13139   | 0.717766655    | 9.32   |
| General average |               |      |                |           |                 |           | 6.40 nm        |        |

**Table S2.** Calculate the microstain and dislocation density from XRD data using ritveald refinement

| Microstrain               | Dislocation density             |
|---------------------------|---------------------------------|
| $\delta$                  | $\epsilon$                      |
| $\epsilon \times 10^{-3}$ | $\text{nm}^{-2} \times 10^{-3}$ |
| 2.032262                  | 62.04065366                     |
| 2.149538                  | 61.70440162                     |
| 2.226096                  | 23.64613718                     |
| 4.097372                  | 58.43871378                     |
| 2.636602                  | 7.197485727                     |
| 8.046667                  | 39.56039018                     |
| 2.688935                  | 11.50862458                     |
| 3.411067                  | 49.13039748                     |

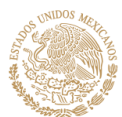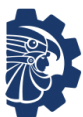

**Table S3.** Calculate the parameter of the crystallographic from XRD data using COD Data

| Peaks | d[Å]   | Int.   | h | k | l |
|-------|--------|--------|---|---|---|
| Pd    | 2.2563 | 100.00 | 1 | 1 | 1 |
|       | 1.9540 | 460.5  | 2 | 0 | 0 |
|       | 1.3817 | 245.2  | 2 | 2 | 0 |
|       | 1.1783 | 263.7  | 3 | 3 | 1 |
| rGO   | 1.6735 | 100    | 0 | 0 | 2 |
|       | 1.0404 | 5.5    | 0 | 0 | 4 |

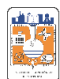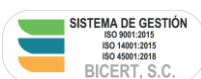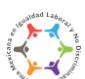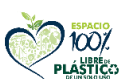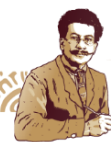

## 2. Use of Pd/rGO for Urea air-breathing Microfluidic Fuel Cell

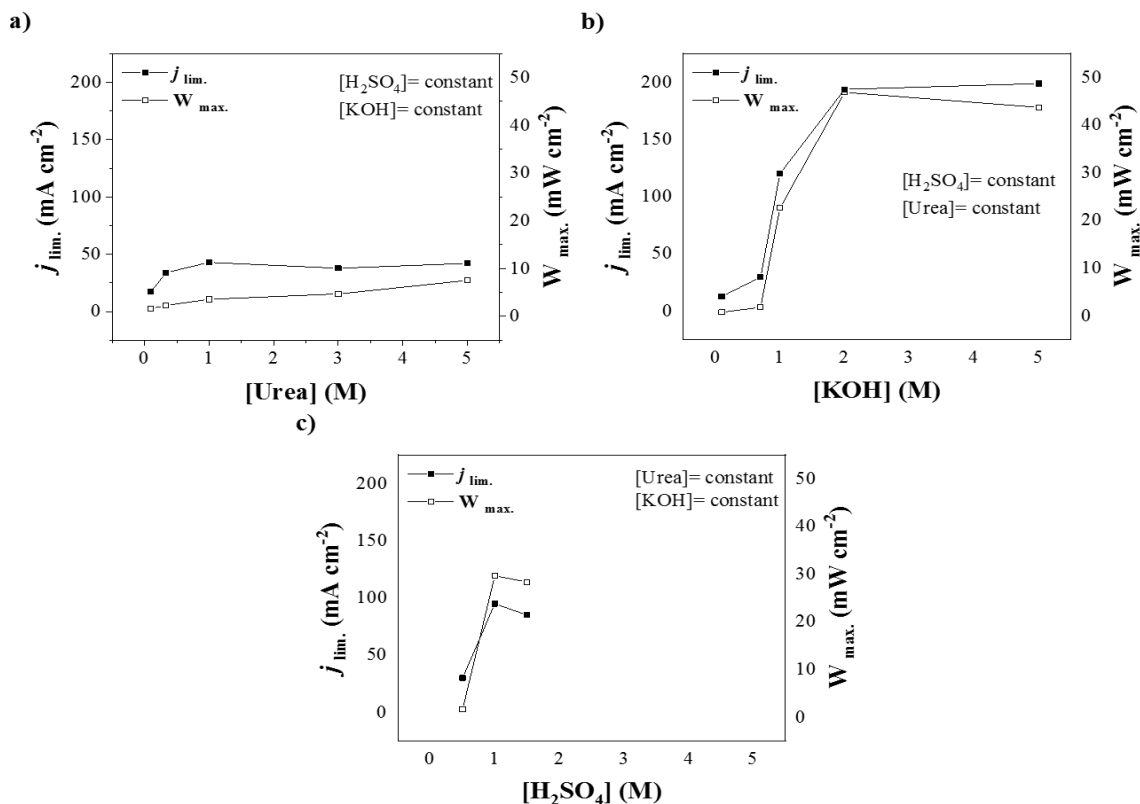

**Fig. S2** Limit current density and maximum power density for a) Urea concentration variation, b) anolyte concentration variation and c) catholyte concentration variation.

Thank you very much in advance for your kind consideration to our work.  
Sincerely yours,

**Dra. Mayra Polett Gurrola**

Earth Sciences Department,

Cátedra-CONACYT-Tecnológico Nacional de México/ Instituto Tecnológico de Chetumal

Av. Insurgentes No. 330, Esq. Andrés Quintana Roo, Colonia David Gustavo Gutiérrez, Apdo. Postal 267 C.P. 77013, Chetumal, Quintana Roo, México

Phone: 52-442-5118545

Email: [mayra.pg@chetumal.tecnm.mx](mailto:mayra.pg@chetumal.tecnm.mx)
